# Supplementary material
Source: PubMed Central journal article supplement (PMC5331621)

**Supplemental Material****Supplemental Table 1.** Forward and reverse primer sequences used for RT-PCR.

| <b>Gene Name</b>                 | <b>Gene ID</b> | <b>Accession #</b> | <b>Sequence</b>                                                       |
|----------------------------------|----------------|--------------------|-----------------------------------------------------------------------|
| <b>IFN-<math>\gamma</math></b>   | 15978          | NM_008337          | <b>F:</b> TTGGCTTTGCAGCTCTTCCT<br><b>R:</b> TGACTGTGCCGTGGCAGTA       |
| <b>IL-12R<math>\beta</math>2</b> | 16162          | NM_008354          | <b>F:</b> CAAGCATTTCATCGCTATCA<br><b>R:</b> TTGCCGGAAGTAACGAATTGA     |
| <b>CCR5</b>                      | 12774          | NM_009917          | <b>F:</b> GTCAAACGCTTTTGCAAACG<br><b>R:</b> TGAGCTTGCACGATCAGGATT     |
| <b>IL-18</b>                     | 16173          | NM_008360          | <b>F:</b> CACATGCGCCTTGTGATGAC<br><b>R:</b> TGCAGCCTCGGGTATTCTGT      |
| <b>IL-17a</b>                    | 16171          | NM_010552          | <b>F:</b> CCTGGCGGCTACAGTGAAG<br><b>R:</b> TTTGGACACGCTGAGCTTTG       |
| <b>IL-2</b>                      | 16183          | NM_008366          | <b>F:</b> AAATAAAGGGCTCTGACAACACA<br><b>R:</b> CACCACAGTTGCTGACTCATCA |
| <b>IL-4</b>                      | 16189          | NM_021283          | <b>F:</b> GGTCTCAACCCCAGCTAGT<br><b>R:</b> GCCGATGATCTCTCTCAAGTGAT    |
| <b>IL-13</b>                     | 16163          | NM_008355          | <b>F:</b> TTGAGGAGCTGAGCAACATCAC<br><b>R:</b> CCATGCTGCCGTTGCA        |
| <b>IL-5</b>                      | 16191          | NM_010558          | <b>F:</b> TGCACTTGAGTGTTCTGACTCTCA<br><b>R:</b> TGTGCTCATGGGAATCTCCAT |
| <b>IL-33</b>                     | 77125          | NM_001164724       | <b>F:</b> ACCAGGTGCTACTACGCTACTATGAG<br><b>R:</b> CACACCGTCGCCTGATTG  |
| <b>TGF-<math>\beta</math></b>    | 21803          | NM_011577          | <b>F:</b> GCAGTGGCTGAACCAAGGA<br><b>R:</b> AGCAGTGAGCGCTGAATCG        |
| <b>IL-10</b>                     | 16153          | NM_010548          | <b>F:</b> GATGCCCCAGGCAGAGAA<br><b>R:</b> CACCCAGGGAATTCAAATGC        |

**Supplemental Figure Legends**

**Figure S1. (A)** Representative M-mode echocardiograms and quantitative group data for LV ejection fraction (EF), end-diastolic volume (EDV), and end-systolic volume (ESV) from heart failure (HF) and sham mice 8 w after permanent coronary ligation or sham surgery (n = 5-6 per group). **(B)** Representative gross images of a sham-operated and failing heart, and group gravimetric data for heart, and wet lung weights. **(C)** Representative gross image of spleens isolated from a HF and sham mouse and group quantitation of organ weight, and total cell counts for CD45<sup>+</sup> leukocytes and CD3<sup>+</sup> T-cells per spleen. All weights normalized to tibia length (n = 4-6 per group).

**Figure S2. (A)** Representative flow cytometry scatter plots for CD3<sup>+</sup>CD4<sup>+</sup> helper and CD3<sup>+</sup>CD8<sup>+</sup> cytotoxic T-cells and group quantitation of CD8<sup>+</sup> T-cell frequency in the circulation at different time intervals post-MI, and absolute cell counts at 8 w post-MI (HF) or sham surgery. **(B)** Representative confocal microscopy images of CD8<sup>+</sup> T-cells (*green*) in sham-operated and failing hearts (8 w post-MI) and group quantitation. **(C)** Representative flow cytometry density plots and group quantitation of CD3<sup>+</sup>CD8<sup>+</sup> T-cells in hearts, **(D)** spleens, and **(E)** lymph nodes (LNs) isolated from sham-operated and HF mice (n = 5-10).

**Figure S3. (A)** Example gross images of heart-draining mediastinal lymph nodes (LNs) from a sham-operated and HF mouse (*Inset*), along with flow cytometry scatter plots for live cell SSC/FSC gate and CD3<sup>+</sup>CD4<sup>+</sup> helper and CD3<sup>+</sup>CD4<sup>+</sup>Foxp3<sup>+</sup> regulatory T-cells in mediastinal LNs and **(B)** corresponding group quantitation. **(C)** Group quantitation of the frequency and absolute number of CD4<sup>+</sup> T-cell LN subsets: Th1 (IFN- $\gamma$ <sup>+</sup>), Th2 (IL-4<sup>+</sup>), and Th17 (IL-17<sup>+</sup>) (n = 4-6 per group).

**Figure S4.** Group quantitation of baseline end-diastolic and end-systolic volume (EDV and ESV), and ejection fraction (EF) in HF mice 4 w post-MI prior to randomization to treatment with either isotype IgG or anti-CD4 antibody (n = 6-10 per group).

**Figure S5.** Naïve mice were adoptively transferred with cardiac CD3<sup>+</sup> T-cells sorted from either naïve control or HF mice and followed for 8 w, as outlined in Figure 6A. **(A)** Quantitative group data for changes in LVEF, EDV, and ESV, in recipient mice 4 and 8 w after cardiac CD3<sup>+</sup> T-cell transfer, along with measured septal and posterior wall (PW) thickness at 8 w. **(B)** Gravimetric data for the same experimental groups at 8 w after transfer. Representative Masson's trichrome stains and quantitation of fibrosis **(C)**, and wheat germ-agglutinin stains (cell membranes green, nuclei blue with DAPI counterstain; scale bar 200 µm) and quantitation of myocyte size **(D)** in mouse hearts 8 w after transfer of naïve control or HF-activated cardiac CD3<sup>+</sup> T-cells. Arrows indicate representative myocytes used for measurement of cross-sectional area.

Figure S1

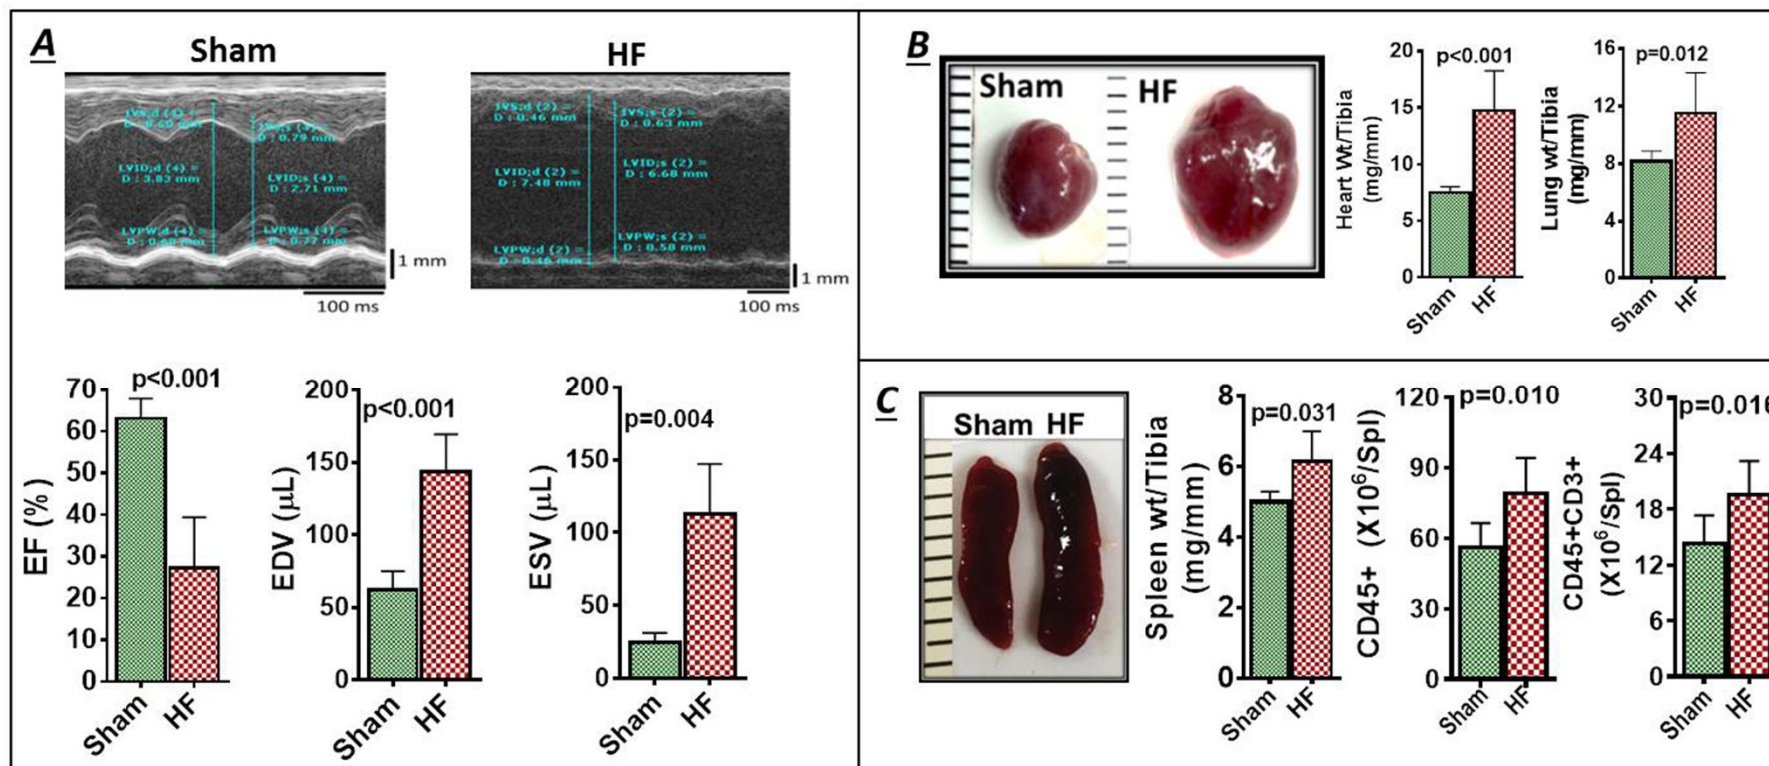

Figure S2

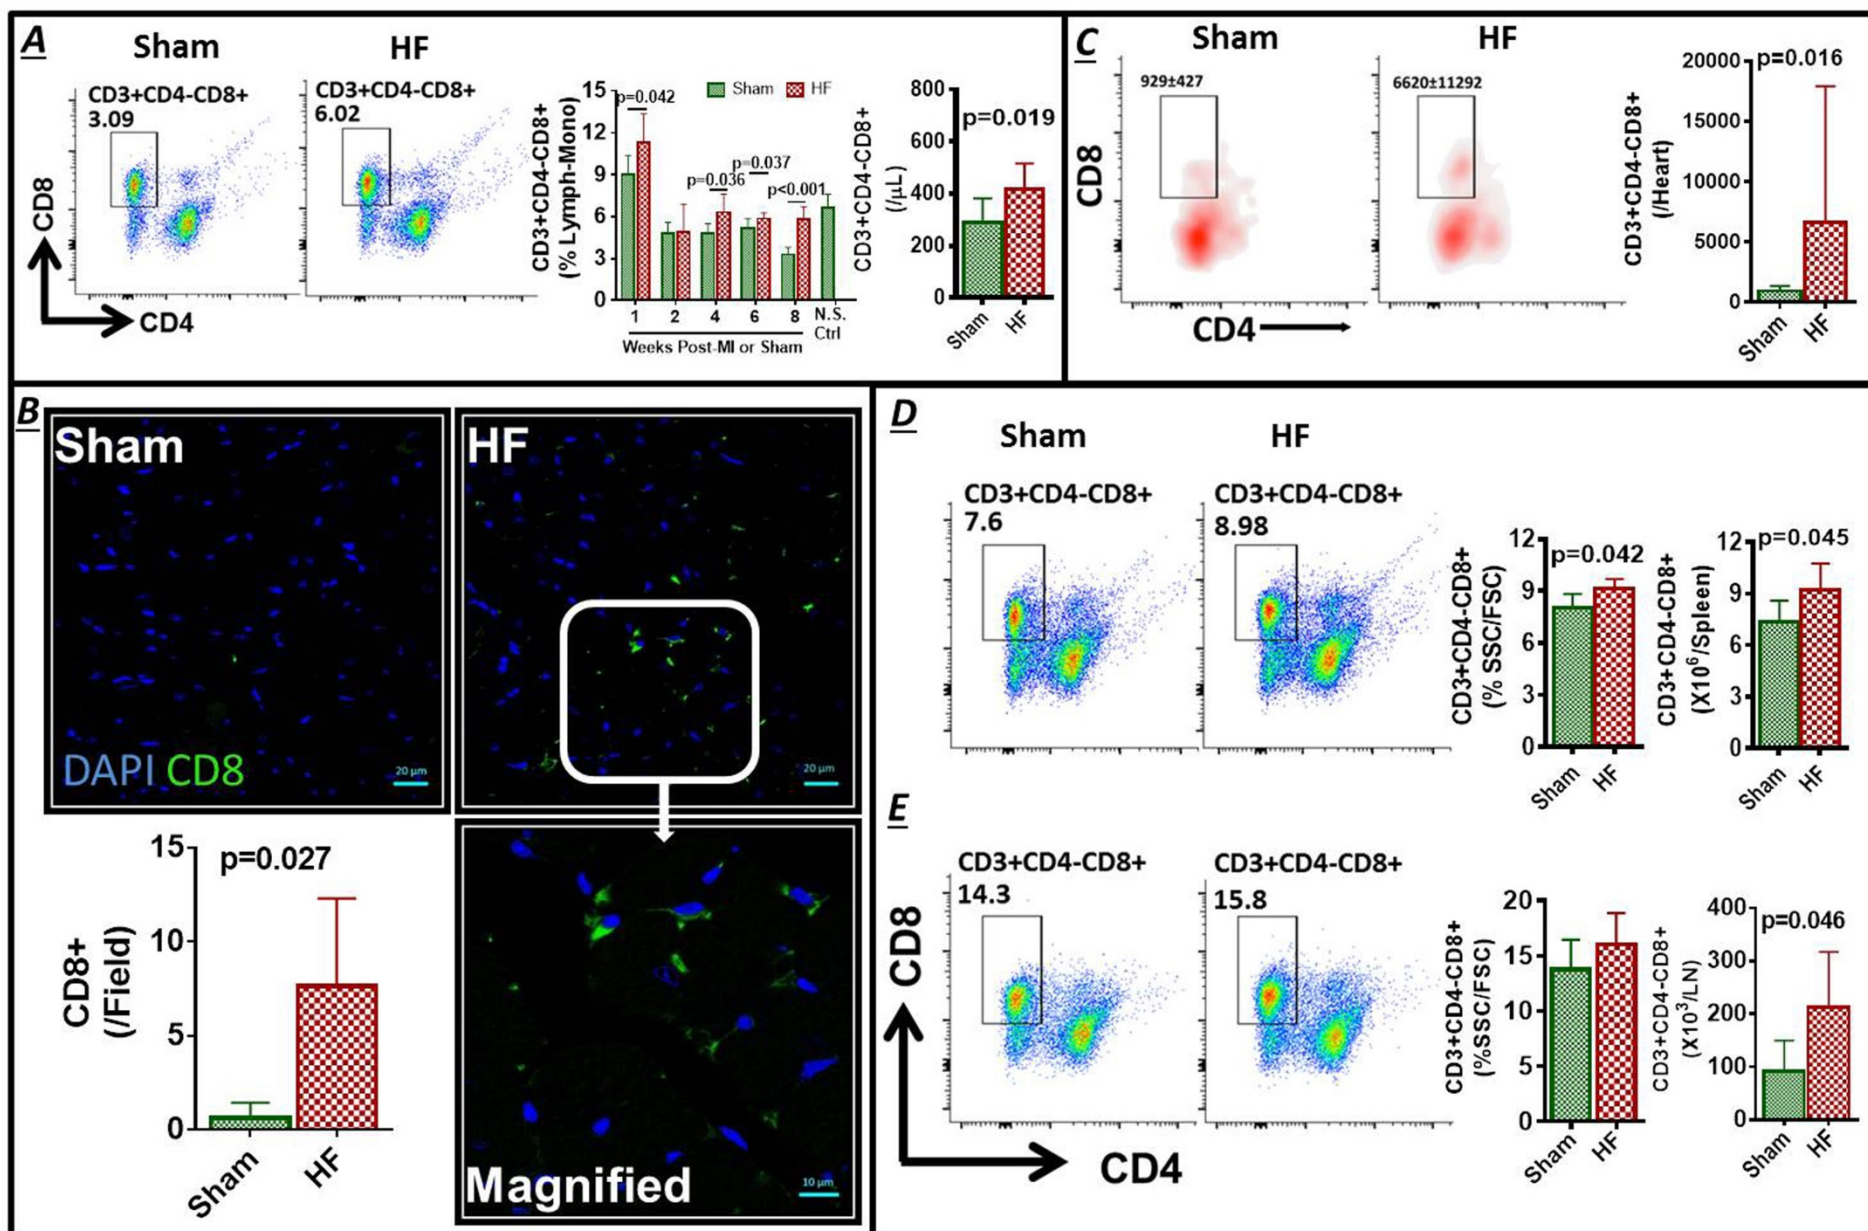



Figure S3

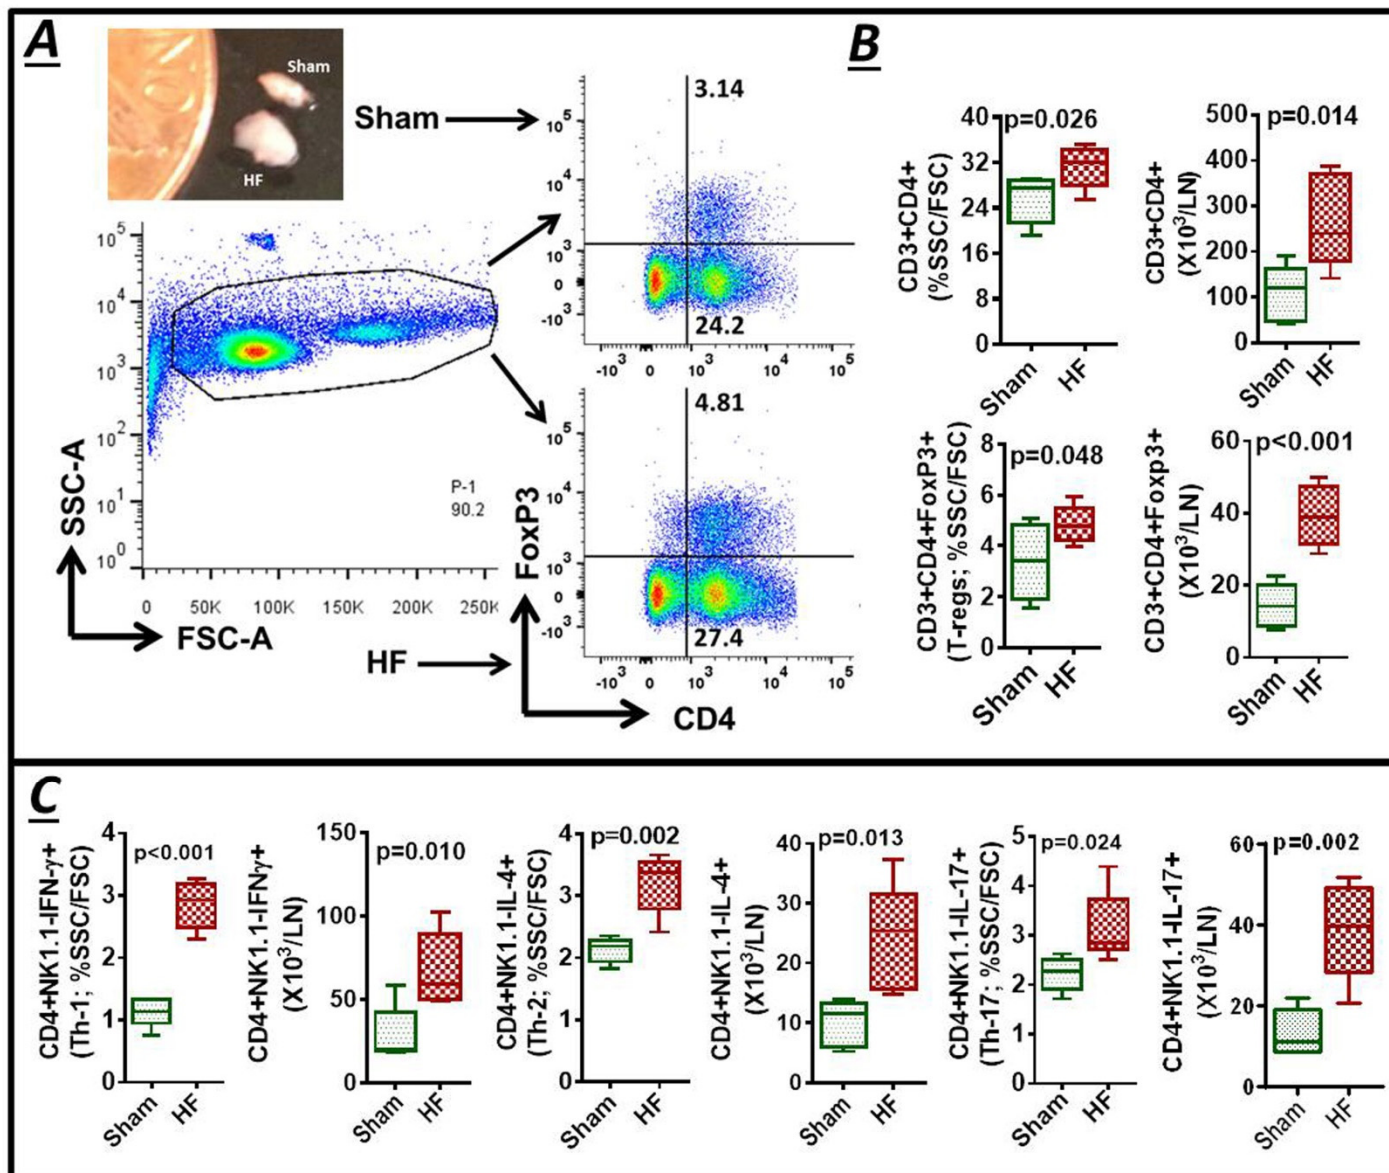

Figure S4

Baseline LV parameters prior to antibody treatment

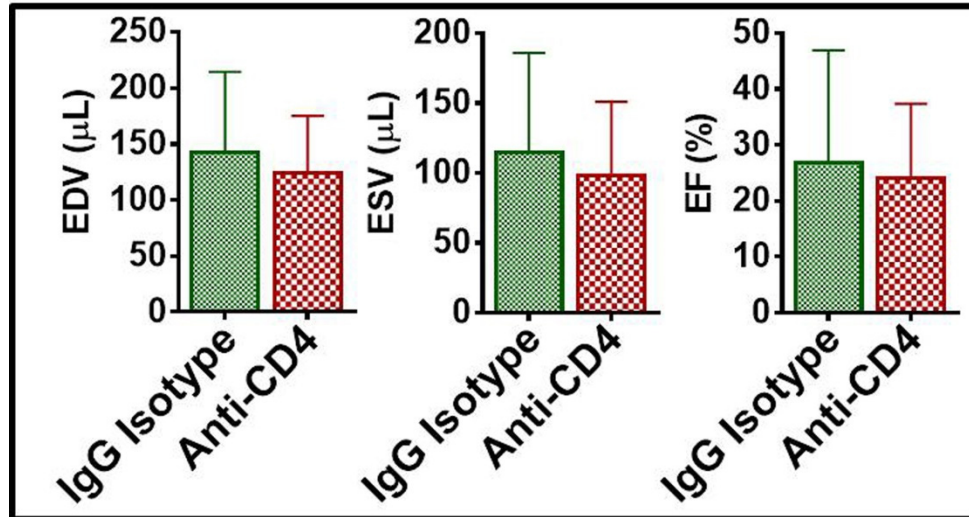

Figure S5

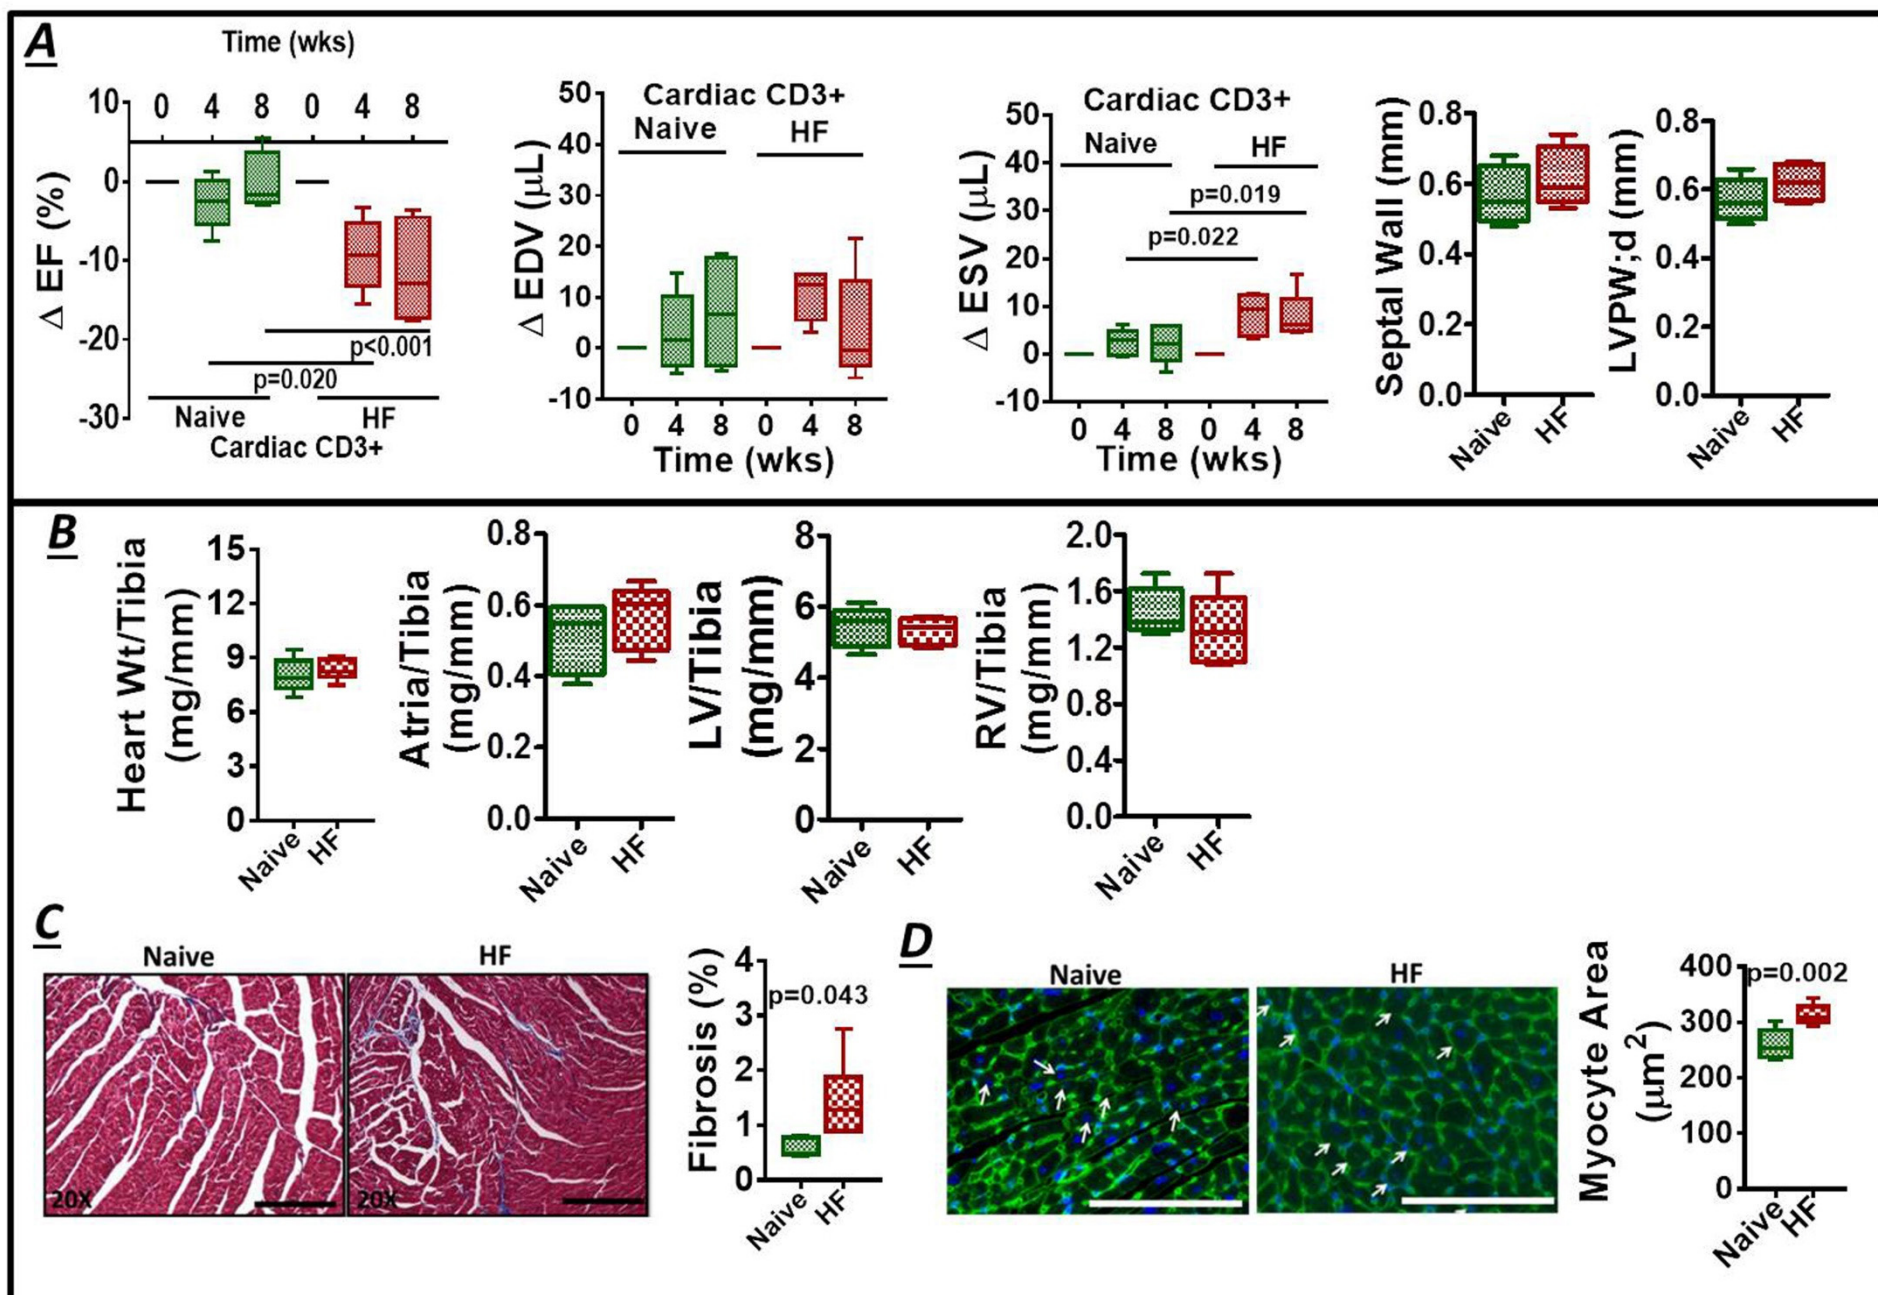

Supplement: NIHMS848954-supplement-Supplemental_Material.pdf [file NIHMS848954-supplement-Supplemental_Material.pdf]
